# Supplementary material for: Comprehensive analysis of PPARγ agonist activities of stereo-, regio-, and enantio-isomers of hydroxyoctadecadienoic acids
Source: Oxford University Press journal article supplement (doi:10.1042/bsr20193767), 2020-04-01
Supplement: bsr-2019-3767_supp.pdf [file bsr-2019-3767_supp.pdf]

# Supplementary figure 1

## 9-(*Z,E*)-HODE

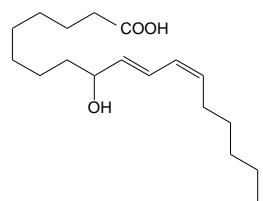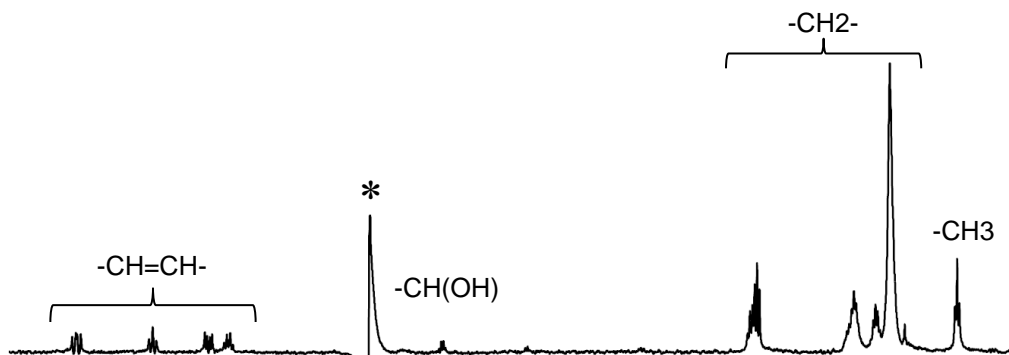

## 9-(*E,E*)-HODE

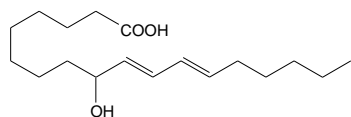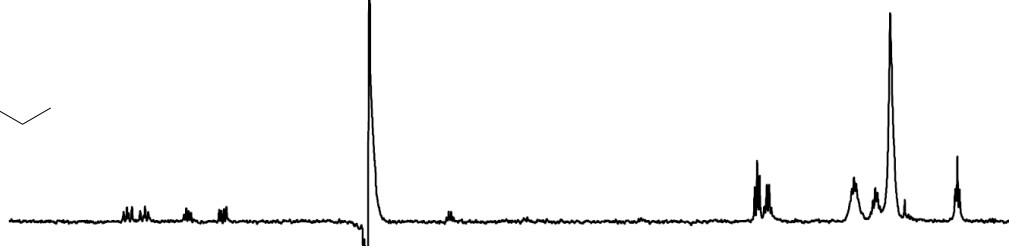

## 10-(*Z,E*)-HODE

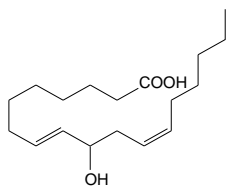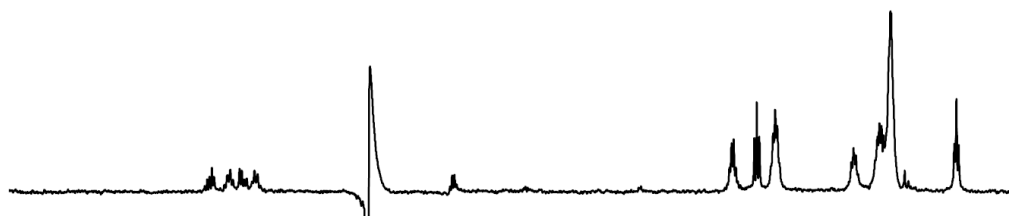

## 12-(*Z,E*)-HODE

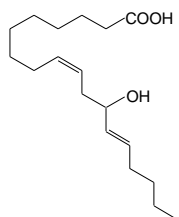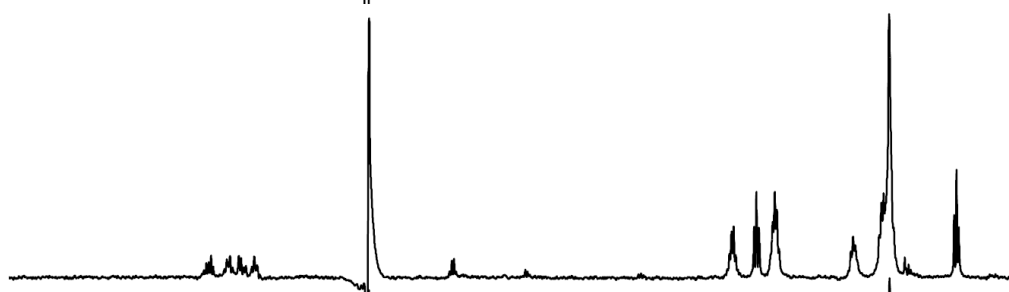

## 13-(*Z,E*)-HODE

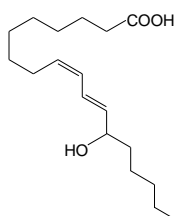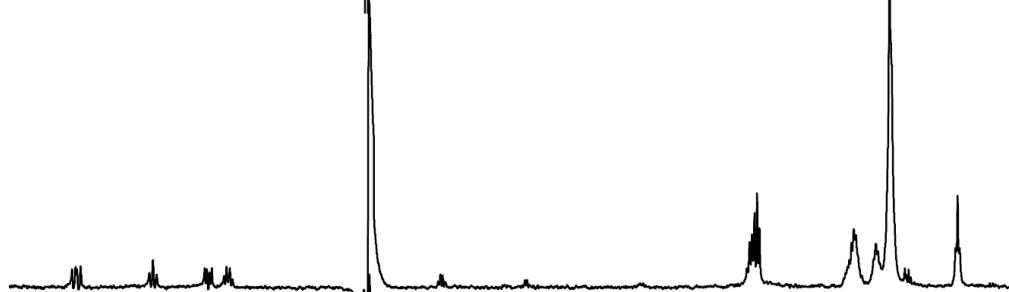

## 13-(*E,E*)-HODE

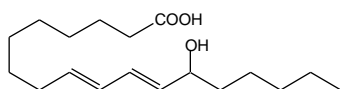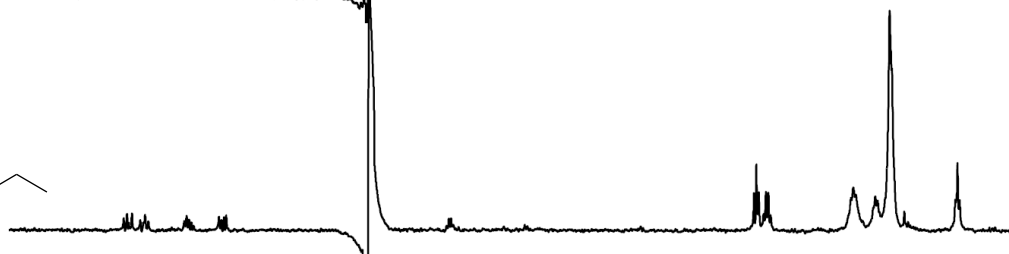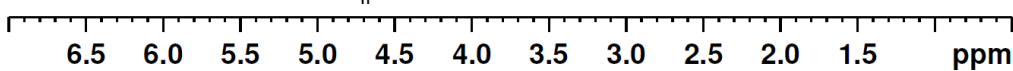

Supplementary Figure 1.  $^1\text{H}$ -NMR spectra recorded for the HODE isomers. The temporary assignments are indicated above the signals. An asterisk indicates the position of the water signal.

# Supplementary figure 2

## WaterLOGSY NMR

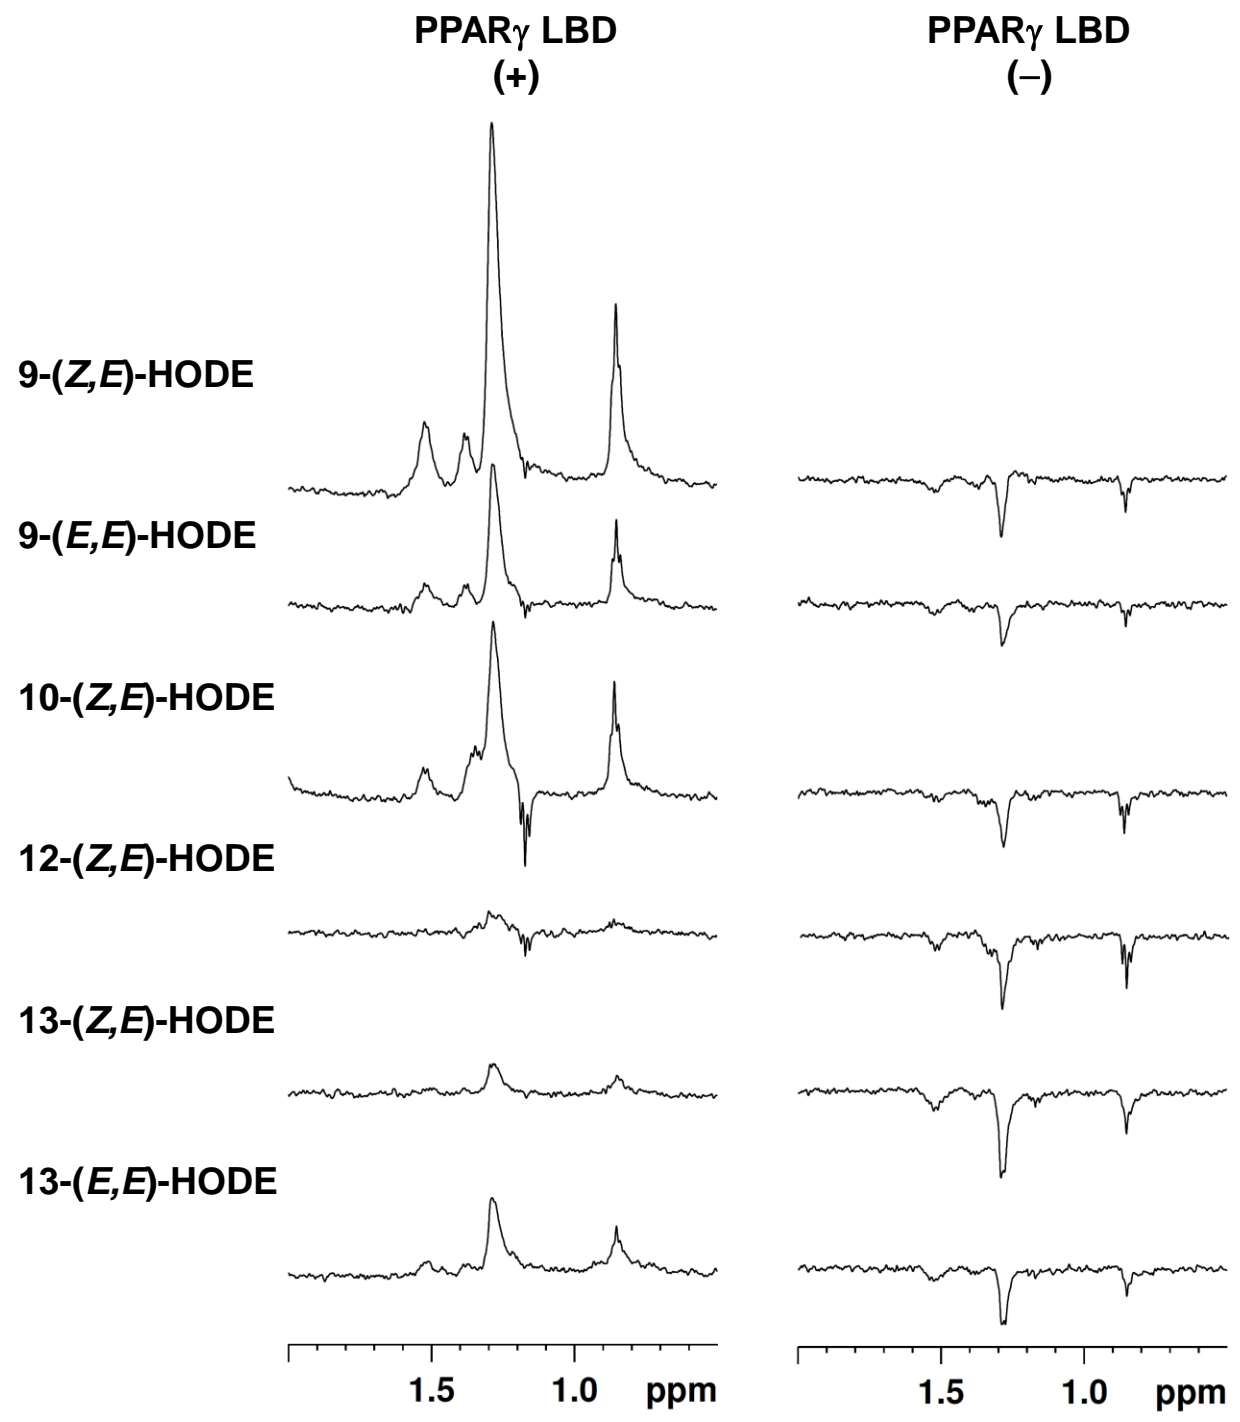

Supplementary Figure 2. WaterLOGSY experiments of the HODE isomers in the presence (left) and absence (right) of PPAR $\gamma$ LBD.
